# Supplementary material for: Simulation of Raman optical activity of multi-component monosaccharide samples
Source: Royal Society of Chemistry journal article supplement (doi:10.1039/c5cp04111b), 2015-12-09
Supplement: c5cp04111b1.pdf [file c5cp04111b1.pdf]

## Simulation of Raman optical activity of multi-component monosaccharide samples

Adéla Melcrová, Jiří Kessler, Petr Bouř, and Jakub Kaminský

### Contents

**Fig. S1.** Relative potential energy distributions

**Fig. S2.** Convergence of the cluster averaging

**Fig. S3.** Comparison of MD and DFT geometry distributions.

**Fig. S4.** Experimental spectra of **DG** and **DM** mixtures.

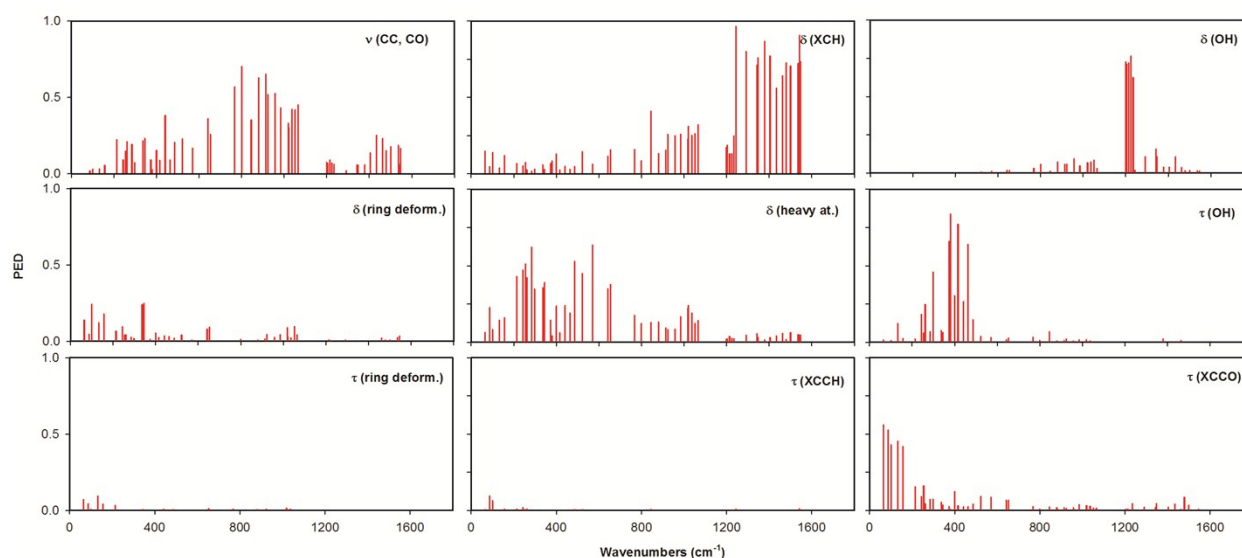

**Fig. S1.** Calculated (B3LYP/6-311++G\*\*/CPCM) relative potential energy distributions (PED) of selected stretching ( $\nu$ ), bending ( $\delta$ ), and torsion ( $\tau$ ) coordinates in **DG** vibrations.

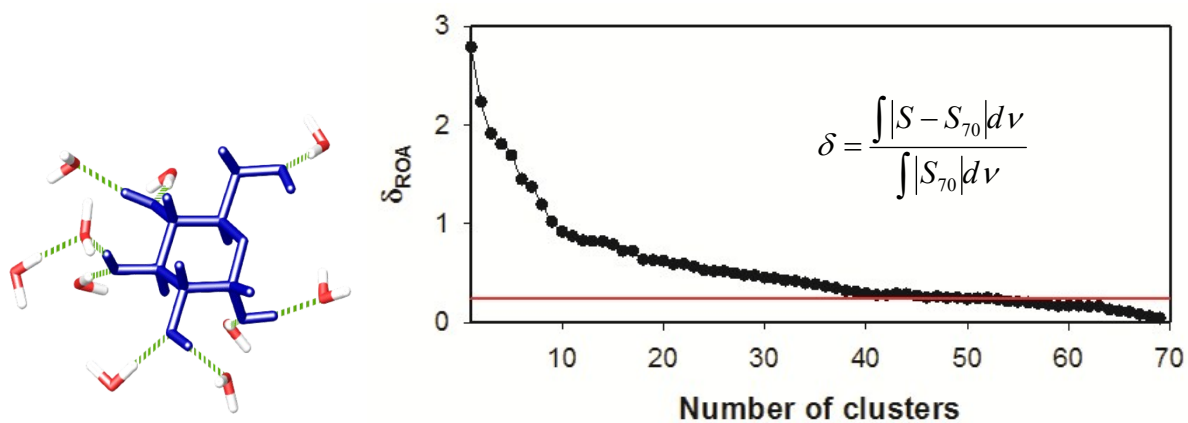

**Fig. S2.** Example of a cluster of  $\alpha$ -D-glucose with water molecules, and dependence of ROA spectral error (in %) on the number of averaged snapshots, preselected from 1000 ones by the parallel variable selection approach (J. Kessler, M. Dračinský and P. Bouř, *J. Comput. Chem.*, 2012, **34**, 366-371).

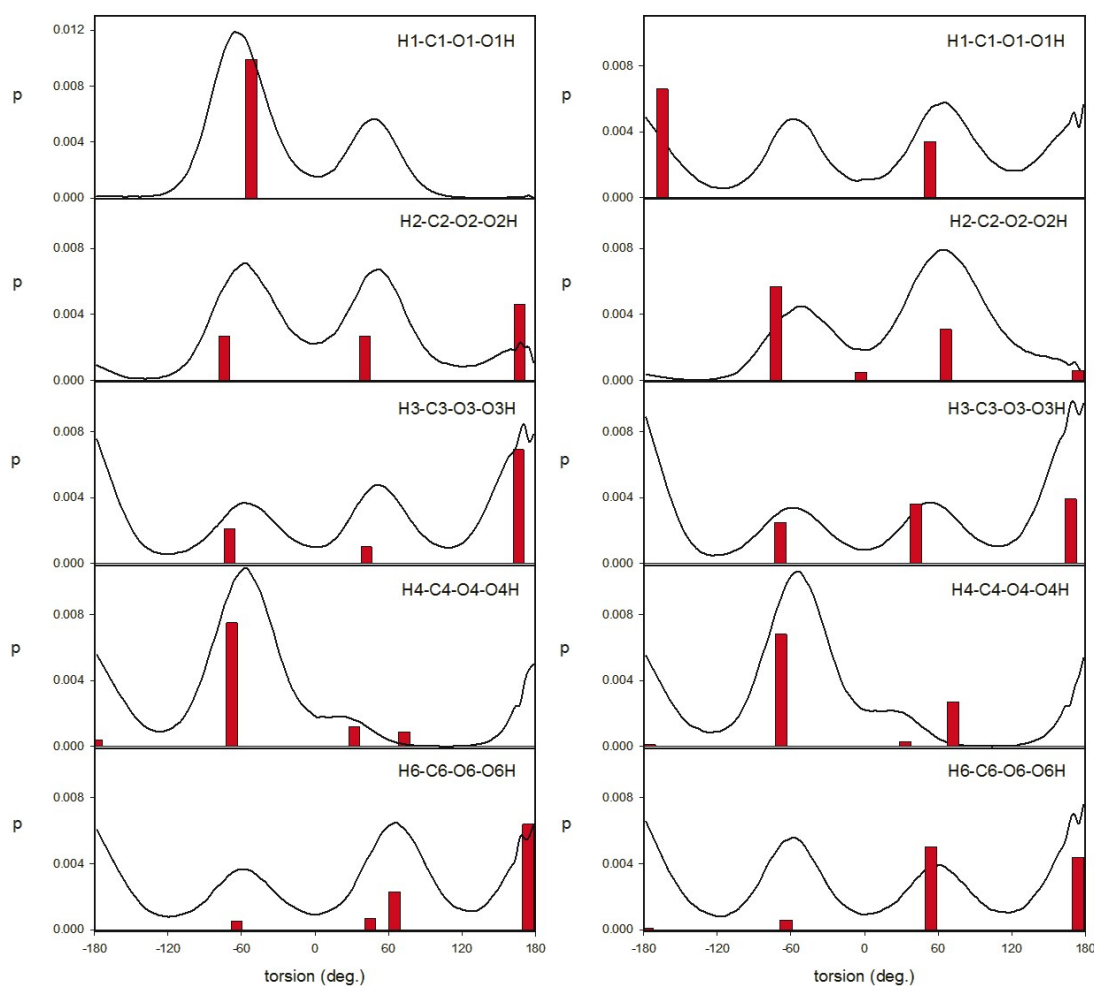

**Fig. S3.** Comparison of selected torsional angles as obtained by MD and DFT computations, for  $\alpha$ -DM (left) and  $\beta$ -DM (right). MD probability histograms (black line) were obtained during 10 ns simulations with the GLYCAM06 force field. The DFT distribution bars (red, in arbitrary scale) were obtained from the B3LYP/6-311++G\*\*/CPCM conformational scan and Boltzmann weighting.

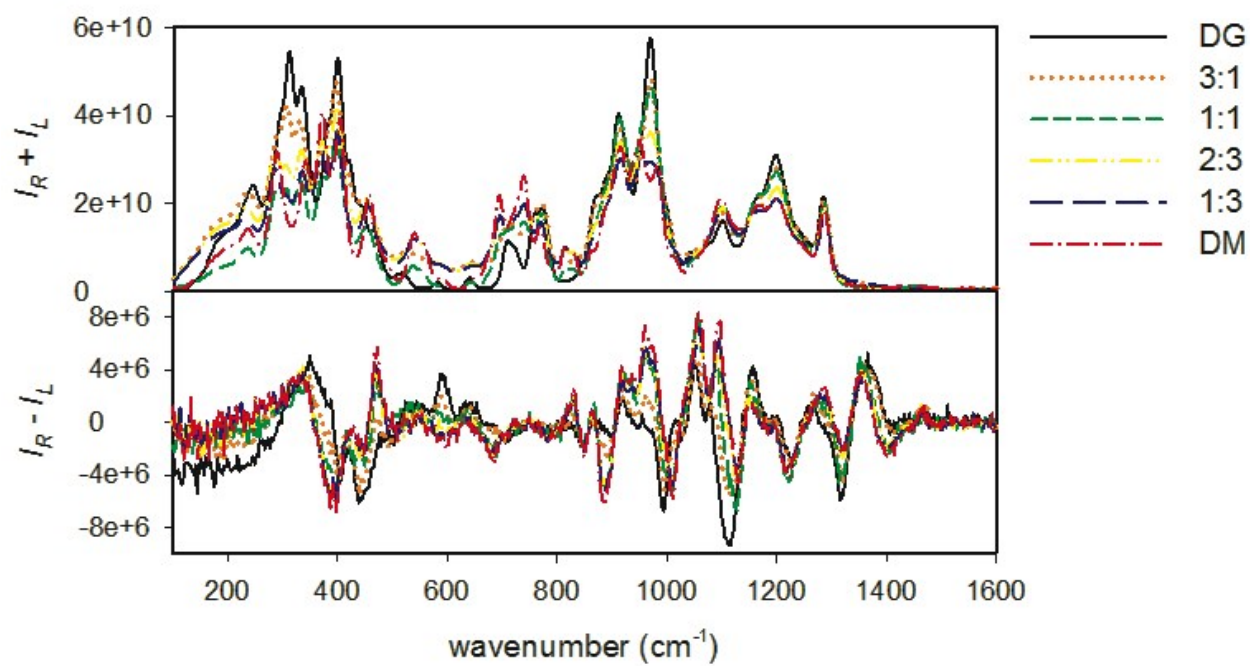

**Fig. S4.** Experimental Raman and ROA spectra of **DG** and **DM** mixtures.
